# Supplementary material for: Alpha-synuclein deposition patterns in Alzheimer’s disease: association with cortical amyloid beta and variable tau load
Source: Research Square preprint supplement (doi:10.21203/rs.3.rs-7022346/v1), 2025-07-14
Supplement: Supplementary file 1 [file 37e6d6f48176bf302cab3823.docx]

**Supplement for**

**Title:**

**Alpha-synuclein deposition patterns in Alzheimer’s disease: association with cortical amyloid beta and variable tau load**

**Authors:**

Antonia Neubauer1,2, Doris Weissenbrunner 1,2, Susanna Pekrun 1,2, Sigrun Roeber1,2, Viktoria Ruf 1,2, Paul Feyen1,2, Felix L. Strübing1,2, Jochen Herms1,2,3

**Affiliations:**

*1Center for Neuropathology and Prion Research, Ludwig Maximilians University of Munich, Munich, Germany*

*2German Center for Neurodegenerative Diseases (DZNE), Munich, Germany*

*3Munich Cluster for Systems Neurology (SyNergy), Munich, Germany*

**Corresponding author:**

Antonia.Neubauer@med.uni-muenchen.de

**Table 1** Overview of 28 annotated regions with size and annotation comments as well as the attribution to a region cluster. Representative areas without artifacts or large blood vessels were selected for all regions. For cortical regions, the annotation is aligned vertically to the brain surface to cover all cortical layers. “Number” refers to the numbering in Fig. 1 of the main manuscript. One “tile” equals 4096*4096 pixels (900 x 900 µm²). Cerebellar regions and the olfactory bulb were not included in region clusters due to the limited number of available stainings in these regions

| **Number** | **Region** | **Comment** | **Label size (approximately)** | **Region cluster** |
| --- | --- | --- | --- | --- |
| 1 | middle frontal gyrus | at the level of the nucleus accumbens | 3x0.5 tiles | cortical |
| 2 | sulcus of middle frontal gyrus | 3x0.5 tiles | cortical |
| 3 | cingulate gyrus, rostral (anterior) part |  | 3x0.5 tiles | cortical |
| 4 | sulcus between cingulate and superior frontal gyrus | on the side of frontal gyrus | 3x0.5 tiles | cortical |
| 5 | long and short insular gyri | at the level of basal ganglia with putamen, globus pallidus and corpus of the caudate nucleus | 3x0.5 tiles | cortical |
| 6 | edge between ventral and dorsal claustrum | 1x1 tile | subcortical |
| 7 | putamen | 1x1 tile | subcortical |
| 8 | superior temporal gyrus | at the level of the amygdala | 3x0.5 tiles | cortical |
| 9 | sulcus between superior and middle temporal gyrus on the side of the middle gyrus | 3x0.5 tiles | cortical |
| 10 | middle temporal gyrus | 3x0.5 tiles | cortical |
| 11 | amygdala (lateral nucleus) | at the level of (trans-)entorhinal cortex | 1x1 tile | amygdala-entorhinal |
| 12 | entorhinal cortex |  | 3x0.5 tiles | amygdala-entorhinal |
| 13 | parietal gyrus | inferior parietal lobulus at the level of the splenium | 3x0.5 tiles | cortical |
| 14 | mediodorsal nucleus of thalamus | at the level of substantia nigra | 1x1 tile | subcortical |
| 15 | lateral nucleus of thalamus | 1x1 tile | subcortical |
| 16 | substantia nigra, pars compacta | representative areas avoiding pigmented neurons | 2 x 0.25 tiles | brainstem |
| 17 | CA4 region of hippocampus | at the level of the lateral geniculate nucleus | 1x1 tile | hippocampal |
| 18 | CA3 region of hippocampus | 1x1 tile | hippocampal |
| 19 | CA2 region of hippocampus | 1x1 tile | hippocampal |
| 20 | CA1 region of hippocampus | 1x1 tile | hippocampal |
| 21 | subiculum | 1x1 tile | hippocampal |
| 22 | parahippocampal gyrus | 3x0.5 tiles | hippocampal |
| 23 | striate area gyrus | Broca areal 17 | 3x0.5 tiles | cortical |
| 24 | striate area sulcus | 3x0.5 tiles | cortical |
| 25 | cerebellar cortex | at the level of the dentate nucleus | 1x1 tile |  |
| 26 | cerebellum, dentate nucleus |  | 1x1 tile |  |
| LC | locus coeruleus | representative areas avoiding pigmented neurons | 2 x 0.25 tiles | brainstem |
| OB | olfactory bulb |  | 1x1 tile |  |

*LC* locus coeruleus, *OB* olfactory bulb


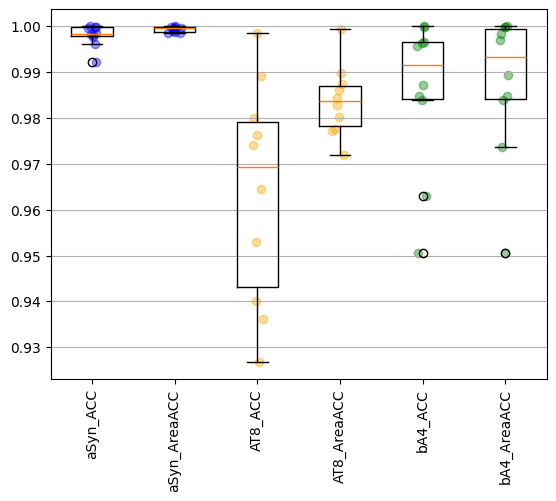


**Fig. 1** Accuracy of the ilastik random forest pixel classifiers tested with ten test images. For each staining, namely alpha-Synuclein (aSyn), tau (AT8), and Amyloid β (bA4), the accuracy was calculated as follows: ACC = (true positive pixels + true negative pixels) / all pixels. Thus, a value close to 1 is a perfect match. As an additional index, the area-accuracy was measured as an accuracy of the absolute pixel values independent of the pixel localization: AreaACC = 1 - (|Ground truth covered area - predicted covered area| / all pixels)

**Table 2** Comparison of the α-syn, tau, and Aβ covered area between αSyn- vs. αSyn+ groups with multiple linear regression without correction for age, sex, and subject ID, and with linear mixed effects models with correction for these factors. Effect size (β) and p-value are presented, respectively

| **Region cluster** | **α-syn**  **β, p (uncor.)** | **α-syn**  **β, p (age, sex, ID cor.)** | **tau**  **β, p (uncor.)** | **tau**  **β, p (age, sex, ID cor.)** | **Aβ**  **β, p (uncor.)** | **Aβ**  **β, p (age, sex, ID cor.)** |
| --- | --- | --- | --- | --- | --- | --- |
| cortical | β=0.010, **p=0.003** | β=0.009, p=0.15 | β=-0.009, p=0.46 | β=-0.016, p=0.68 | β=0.023, **p<0.001** | β=0.014, p=0.33 |
| subcortical | β=0.003, **p=0.025** | β=0.003, p=0.07 | β=0.003, p=0.68 | β=-0.003, p=0.69 | β=0.015, **p=0.022** | β=0.012, p=0.33 |
| hippocampal | β=0.005, **p=0.003** | β=0.005, p=0.07 | β=-0.017, p=0.22 | β=-0.015, p=0.68 | β=0.010, **p=0.016** | β=0.007, p=0.48 |
| Amygdala-entorhinal | β=0.014, **p<0.001** | β=0.013, **p<0.001** | β=-0.046, p=0.11 | β=-0.044, p=0.29 | β=-0.003, p=0.69 | β=-0.003, p=0.85 |
| brainstem | β=0.005, **p=0.003** | β=0.005, p=0.07 | β=-0.003, p=0.64 | β=-0.002, p=0.69 | β=0.002, p=0.69 | β=-0.0005, p=0.85 |

All p-values were FDR corrected. Significant p-values were labeled in bold. *cor.* corrected, *FDR* false discovery rate, *ID* subject ID, *p* p-value, *uncor.* Uncorrected

**Table 3** Comparison of the α-syn covered area between αSyn- vs. αSyn+ groups with multiple linear regression controlling and not controlling for age and sex

| **Region name** | **n (αSyn-)** | **n (αSyn+)** | **Median [IQR] [%] of αSyn- cases** | **Median [IQR] [%] of αSyn+ cases** | **p (uncor.)** | **p (age, sex cor.)** |
| --- | --- | --- | --- | --- | --- | --- |
| medial frontal gyrus | 8 | 39 | 0.001 [0.0005; 0.0019] | 0.034 [0.0058; 0.15] | 0.5 | 0.53 |
| frontal sulcus | 8 | 38 | 0.001 [0.0004; 0.0017] | 0.039 [0.0049; 0.27] | 0.47 | 0.47 |
| cingulate gyrus | 8 | 34 | 0.0021 [0.0002; 0.0048] | 0.23 [0.0515; 1.34] | 0.35 | 0.32 |
| cingulate sulcus | 8 | 35 | 0.0009 [0.0006; 0.0024] | 0.23 [0.0113; 1.26] | 0.35 | 0.32 |
| parietal gyrus | 7 | 39 | 0.0013 [0.0005; 0.0022] | 0.0596 [0.0028; 0.28] | 0.35 | 0.32 |
| superior temporal gyrus | 9 | 38 | 0.0007 [0.0004; 0.0024] | 0.19 [0.012; 0.53] | 0.4 | 0.38 |
| temporal sulcus | 9 | 37 | 0.001 [0.0005; 0.0068] | 0.19 [0.023; 0.73] | 0.39 | 0.37 |
| medial temporal gyrus | 9 | 35 | 0.0021 [0.0003; 0.0037] | 0.102 [0.015; 0.46] | 0.38 | 0.35 |
| occipital gyrus | 1 | 10 | 0.006 [0.006; 0.006] | 0.0043 [0.0012; 0.055] | 0.66 | 0.32 |
| occipital sulcus | 1 | 10 | 0.0032 [0.0032; 0.0032] | 0.0037 [0.002; 0.096] | 0.66 | 0.61 |
| insula cortex | 5 | 33 | 0.0005 [0.0004; 0.0057] | 0.4092 [0.027; 1.35] | 0.35 | 0.32 |
| claustrum | 9 | 36 | 0.0002 [0.0001; 0.0014] | 0.16 [0.017; 0.42] | 0.35 | 0.32 |
| putamen | 9 | 38 | 0.0037 [0.0001; 0.0086] | 0.059 [0.016; 0.49] | 0.35 | 0.32 |
| hippocampus CA1 | 5 | 30 | 0.0004 [0.0001; 0.0008] | 0.15 [0.012; 0.48] | 0.37 | 0.32 |
| hippocampus CA2 | 5 | 29 | 0.0001 [0.0001; 0.0041] | **0.58** [0.094; 1.32] | 0.35 | 0.32 |
| hippocampus CA3 | 5 | 28 | 0.0003 [0.0003; 0.001] | 0.10 [0.017; 0.35] | 0.35 | 0.32 |
| hippocampus CA4 | 5 | 30 | 0.0008 [0.0004; 0.0011] | 0.046 [0.0048; 0.31] | 0.35 | 0.32 |
| subiculum | 5 | 30 | 0.0008 [0.0005; 0.0066] | 0.16 [0.038; 0.78] | 0.35 | 0.32 |
| parahippocampal gyrus | 5 | 29 | 0.0011 [0.0004; 0.0038] | 0.24 [0.022; 0.79] | 0.35 | 0.32 |
| thalamus medial nucl. | 2 | 12 | 0.0005 [0.0002; 0.0007] | 0.026 [0.012; 0.13] | 0.4 | 0.32 |
| thalamus ventrolat. nucl. | 2 | 11 | 0.0007 [0.0004; 0.0011] | 0.024 [0.0022; 0.11] | 0.47 | 0.32 |
| cerebellar cortex | 0 | 7 | nan [nan; nan] | 0.0011 [0.0002; 0.0023] | nan | nan |
| cerebellum dentate nucl. | 0 | 7 | nan [nan; nan] | 0.006 [0.0024; 0.0065] | nan | nan |
| substantia nigra | 17 | 33 | 0.0047 [0.0008; 0.0064] | 0.37 [0.027; 1.1] | **0.004** | **0.005** |
| locus coeruleus | 19 | 39 | 0.0014 [0.0005; 0.0044] | 0.11 [0.014; 0.36] | 0.35 | 0.32 |
| amygdala | 27 | 37 | 0.0006 [0.0001; 0.0117] | **1.01** [0.415; 2.04] | **0.004** | **0.005** |
| entorhinal gyrus | 27 | 33 | 0.0019 [0.0008; 0.0052] | 0.46 [0.14; 1.16] | **0.013** | **0.023** |
| olfactory bulb | 9 | 15 | 0.0009 [0.0003; 0.0272] | **0.51** [0.32; 0.89] | **0.014** | **0.023** |

All p-values were FDR corrected. Significant p-values and the three highest median α-syn loads of the αSyn+ group were labeled in bold. *cor.* corrected, *FDR* false discovery rate, *IQR* interquartile range, *nan* not enough values available, *p* p-value, *uncor.* Uncorrected

**Table 4** Comparison of the tau covered area between αSyn- vs. αSyn+ groups with multiple linear regression controlling and not controlling for age and sex

| **Region name** | **n (αSyn-)** | **n (αSyn+)** | **Median [IQR] [%] of αSyn- cases** | **Median [IQR] [%] of αSyn+ cases** | **p (uncor.)** | **p (age, sex cor.)** |
| --- | --- | --- | --- | --- | --- | --- |
| medial frontal gyrus | 22 | 34 | 18.8 [12.4; 23] | 15.5 [6.2; 22.6] | 0.88 | 0.9 |
| frontal sulcus | 23 | 31 | 21.5 [11.7; 25.5] | 15.1 [4.8; 23.9] | 0.88 | 0.77 |
| cingulate gyrus | 12 | 28 | 13.7 [6; 20.5] | 15.4 [5.5; 25.4] | 0.88 | 0.98 |
| cingulate sulcus | 12 | 27 | 12 [8.1; 21.7] | 13.1 [6.2; 22.1] | 0.97 | 0.9 |
| parietal gyrus | 8 | 15 | 11.3 [7.6; 15.9] | **22.5** [11.7; 28.4] | 0.72 | 0.77 |
| superior temporal gyrus | 28 | 42 | 17.4 [11.4; 23.3] | 14.4 [9.5; 22.3] | 0.88 | 0.9 |
| temporal sulcus | 27 | 41 | 21.3 [16.1; 26.9] | 16.8 [11.4; 24.5] | 0.72 | 0.77 |
| medial temporal gyrus | 28 | 39 | 18.7 [14.1; 25.3] | 17.7 [10.1; 25.7] | 0.88 | 0.9 |
| occipital gyrus | 25 | 41 | 4.6 [1.8; 7.8] | 3.9 [0.5; 7.8] | 0.88 | 0.9 |
| occipital sulcus | 25 | 41 | 6.9 [2.7; 10.2] | 4.9 [1.3; 11.9] | 0.93 | 0.98 |
| insula cortex | 6 | 16 | 15.9 [12.1; 22.3] | **22.3** [11.4; 24.9] | 0.88 | 0.9 |
| claustrum | 8 | 19 | 7.3 [5.8; 9.8] | 6.6 [3.1; 12.6] | 0.97 | 0.9 |
| putamen | 9 | 19 | 2.5 [1.5; 4.2] | 1.8 [0.5; 4.2] | 0.97 | 0.9 |
| hippocampus CA1 | 23 | 38 | 24.2 [16; 26.3] | 19.6 [15.7; 27.6] | 0.88 | 0.9 |
| hippocampus CA2 | 21 | 36 | 25.9 [14.6; 30.3] | 21.9 [14; 32.2] | 0.88 | 0.9 |
| hippocampus CA3 | 23 | 35 | 12.8 [6.2; 19.1] | 16.2 [6.2; 21.3] | 0.88 | 0.9 |
| hippocampus CA4 | 22 | 38 | 13.3 [5.8; 19.8] | 11.9 [5.9; 20.3] | 0.97 | 0.98 |
| subiculum | 23 | 38 | **32.1** [26; 36.4] | **26.3** [17.7; 35.4] | 0.6 | 0.72 |
| parahippocampal gyrus | 21 | 37 | 18.2 [15.2; 21.2] | 16.8 [10.1; 24] | 0.91 | 0.98 |
| thalamus medial nucl. | 11 | 17 | 1.5 [0.6; 3.5] | 1.6 [0.5; 3.5] | 0.88 | 0.98 |
| thalamus ventrolat. nucl. | 11 | 17 | 0.5 [0.2; 1] | 1 [0.3; 1.4] | 0.88 | 0.9 |
| cerebellar cortex | 4 | 14 | 0 [0; 0] | 0 [0; 0.1] | 0.91 | 0.9 |
| cerebellum dentate nucl. | 4 | 14 | 0.1 [0; 0.1] | 0 [0; 0.1] | 0.88 | 0.9 |
| substantia nigra | 15 | 24 | 2.4 [0.018; 4.2] | 1.6 [1.1; 2.5] | 0.88 | 0.9 |
| locus coeruleus | 20 | 31 | 2.4 [0.017; 3.5] | 2.2 [1.5; 3.1] | 0.97 | 0.98 |
| amygdala | 21 | 33 | **25.9** [0.188; 35.8] | 19.8 [12.7; 31.7] | 0.88 | 0.85 |
| entorhinal gyrus | 21 | 30 | **26.8** [0.176; 32.7] | 18.7 [11.5; 25.4] | 0.65 | 0.77 |
| olfactory bulb | 10 | 14 | 5.6 [0.037; 10.3] | 6.8 [3.5; 8.5] | 0.97 | 0.98 |

All p-values were FDR corrected. The three highest median tau loads of αSyn+ and αSyn- groups were labeled in bold. *cor.* corrected, *FDR* false discovery rate, *IQR* interquartile range, *p* p-value, *uncor.* Uncorrected

**Table 5** Comparison of the Aβ covered area between αSyn- vs. αSyn+ groups with multiple linear regression controlling and not controlling for age and sex

| **Region name** | **n (αSyn-)** | **n (αSyn+)** | **Median [IQR] [%] of αSyn- cases** | **Median [IQR] [%] of αSyn+ cases** | **p (uncor.)** | **p (age, sex cor.)** |
| --- | --- | --- | --- | --- | --- | --- |
| medial frontal gyrus | 20 | 37 | 3.6 [2.8; 5.8] | 4.9 [2.9; 9.5] | 0.36 | 0.57 |
| frontal sulcus | 21 | 34 | **6.4** [3.9; 11.3] | **6.5** [4.6; 13.8] | 0.65 | 0.99 |
| cingulate gyrus | 0 | 4 | nan [nan; nan] | 1.9 [1.6; 2.3] | nan | nan |
| cingulate sulcus | 0 | 4 | nan [nan; nan] | 3.5 [2.3; 5.1] | nan | nan |
| parietal gyrus | 15 | 26 | **4.7** [3.4; 6.1] | **7.7** [4.4; 9.2] | 0.39 | 0.57 |
| superior temporal gyrus | 14 | 28 | 3.7 [1.6; 5.8] | 5.9 [3.4; 9] | 0.36 | 0.57 |
| temporal sulcus | 13 | 27 | 5 [2.9; 7.3] | **6.5** [4.5; 11.3] | 0.34 | 0.57 |
| medial temporal gyrus | 14 | 27 | **4.5** [3.3; 5.4] | 5.4 [3.2; 10.9] | 0.36 | 0.57 |
| occipital gyrus | 24 | 37 | 2.7 [1.7; 4.8] | 3.5 [1.9; 8.5] | 0.34 | 0.57 |
| occipital sulcus | 24 | 37 | 3.2 [2.3; 5] | 4.5 [2.4; 9.7] | 0.34 | 0.57 |
| insula cortex | 4 | 27 | 1.5 [1; 2.1] | 5.3 [4; 8.5] | 0.34 | 0.57 |
| claustrum | 4 | 27 | 0.7 [0.4; 0.9] | 2.1 [1; 4] | 0.34 | 0.57 |
| putamen | 4 | 28 | 0.7 [0.4; 0.8] | 1.5 [0.8; 4.5] | 0.36 | 0.57 |
| hippocampus CA1 | 17 | 39 | 0.9 [0.6; 1.8] | 1.2 [0.2; 2.7] | 0.44 | 0.57 |
| hippocampus CA2 | 15 | 36 | 0.2 [0; 0.5] | 0.2 [0; 0.8] | 0.44 | 0.57 |
| hippocampus CA3 | 17 | 35 | 0.6 [0; 1.5] | 1.1 [0; 2.6] | 0.36 | 0.57 |
| hippocampus CA4 | 17 | 39 | 1.2 [0.2; 1.5] | 1.1 [0.4; 2.5] | 0.92 | 0.99 |
| subiculum | 17 | 39 | 1.2 [0.6; 3.3] | 2.2 [1.1; 5.2] | 0.39 | 0.57 |
| parahippocampal gyrus | 15 | 38 | 1.6 [0.6; 2.9] | 3.6 [1; 5] | 0.34 | 0.57 |
| thalamus medial nucl. | 6 | 19 | 0.4 [0.3; 1.3] | 1.3 [0.1; 3.6] | 0.44 | 0.57 |
| thalamus ventrolat. nucl. | 6 | 19 | 0.3 [0.2; 1.3] | 1.2 [0.1; 2.1] | 0.44 | 0.57 |
| cerebellar cortex | 24 | 35 | 0.8 [0.1; 1.4] | 0.6 [0; 1.9] | 0.44 | 0.57 |
| cerebellum dentate nucl. | 24 | 35 | 0 [0; 0.3] | 0 [0; 0.6] | 0.44 | 0.57 |
| substantia nigra | 24 | 28 | 0.8 [0.3; 1.5] | 0.6 [0.3; 1.6] | 0.81 | 0.99 |
| locus coeruleus | 2 | 4 | 0.1 [0; 0.1] | 0.8 [0.6; 1.1] | 0.44 | 0.99 |
| amygdala | 8 | 16 | 2.5 [1.5; 2.9] | 1.8 [0.6; 3.5] | 0.98 | 0.99 |
| entorhinal gyrus | 8 | 15 | 2.1 [1.5; 3.5] | 1.5 [1; 2.1] | 0.65 | 0.76 |
| olfactory bulb | 0 | 1 | nan [nan; nan] | 2.8 [2.8; 2.8] | nan | nan |

All p-values were FDR corrected. The three highest median Aβ loads of αSyn+ and αSyn- groups were labeled in bold. *cor.* corrected, *FDR* false discovery rate, *IQR* interquartile range, *nan* not enough values available, *p* p-value, *uncor.* Uncorrected

**Table 6** Available n, median and interquartile range of α-syn covered area of α-syn subgroups

| **Region cluster** | **n (αSyn+A)** | **Median [IQR] [%] of αSyn+A** | **n (αSyn+B)** | **Median [IQR] [%] of αSyn+B** | **n (αSyn+C)** | **Median [IQR] [%] of αSyn+C** |
| --- | --- | --- | --- | --- | --- | --- |
| cortical | 108 | 0.0038 [0.0011; 0.017] | 45 | 0.067 [0.022; 0.12] | 186 | 0.43 [0.10; 1.44] |
| subcortical | 34 | 0.005 [0.0011; 0.020] | 6 | 0.059 [0.050; 0.11] | 53 | 0.31 [0.12; 0.58] |
| hippocampal | 59 | 0.014 [0.0026; 0.13] | 24 | 0.062 [0.020; 0.24] | 87 | 0.58 [0.19; 1.11] |
| amygdala-entorhinal | 28 | **0.47** [0.118; 0.86] | 7 | 0.088 [0.044; 0.38] | 33 | **1.28** [0.58; 3.24] |
| brainstem | 26 | 0.0076 [0.0039; 0.091] | 9 | **0.643** [0.35; 1.078] | 37 | 0.41 [0.092; 1.09] |

The highest median α-syn covered area of each subgroup was labeled in bold. *IQR* interquartile range

**Table 7** Available n, median and interquartile range of tau covered area of α-syn subgroups

| **Region cluster** | **n (αSyn+A)** | **Median [IQR] [%] of αSyn+A** | **n (αSyn+B)** | **Median [IQR] [%] of αSyn+B** | **n (αSyn+C)** | **Median [IQR] [%] of αSyn+C** |
| --- | --- | --- | --- | --- | --- | --- |
| cortical | 120 | 17.6 [9.9; 24.6] | 44 | 4.0 [0.5; 10.9] | 186 | 12.6 [4.4; 23.4] |
| subcortical | 32 | 1.6 [0.6; 5.2] | 6 | 1.0 [0.3; 2.5] | 32 | 1.9 [0.5; 6.1] |
| hippocampal | 81 | 18.9 [10.4; 27.2] | 30 | 9.6 [3.2; 15.1] | 105 | **20.8** [13.7; 28.6] |
| amygdala-entorhinal | 20 | **20.6** [14.9; 30.1] | 5 | **11.1** [9.9; 17.2] | 36 | 20.5 [12.1; 31.4] |
| brainstem | 21 | 1.9 [1.1; 2.6] | 7 | 1.3 [0.9; 1.8] | 27 | 2.1 [1.5; 3.1] |

The highest median tau covered area of each subgroup was labeled in bold. *IQR* interquartile range

**Table 8** Available n, median and interquartile range of Aβ covered area of α-syn subgroups

| **Region cluster** | **n (αSyn+A)** | **Median [IQR] [%] of αSyn+A** | **n (αSyn+B)** | **Median [IQR] [%] of αSyn+B** | **n (αSyn+C)** | **Median [IQR] [%] of αSyn+C** |
| --- | --- | --- | --- | --- | --- | --- |
| cortical | 97 | **4.7** [3.4; 9.4] | 30 | **4.0** [2.2; 5.8] | 152 | **6.1** [3.0; 10.3] |
| subcortical | 34 | 1.9 [1.0; 3.8] | 10 | 0.8 [0.4; 1.8] | 47 | 1.3 [0.2; 2.8] |
| hippocampal | 81 | 1.4 [0.4; 3.7] | 22 | 0.5 [0.0; 1.9] | 117 | 1.2 [0.3; 3.3] |
| amygdala-entorhinal | 8 | 0.9 [0.5; 1.5] | 6 | 1.5 [0.6; 2.0] | 15 | 2.0 [1.2; 2.9] |
| brainstem | 10 | 1.0 [0.4; 1.7] | 5 | 0.5 [0.5; 0.6] | 17 | 0.8 [0.1; 2.0] |

The highest median Aβ covered area of each subgroup was labeled in bold. *IQR* interquartile range

**Table 9** Comparison of αSyn- cases vs. α-syn positive subgroups namely αSyn+A, amygdala predominant, αSyn+B, brainstem predominant, and αSyn+C, cortical α-syn subgroups. These groups were compared pairwise with multiple linear regression correcting only for the specific brain region names (uncor.), correcting additionally for age and sex or as a linear mixed effects model with an additional random factor for the subject ID. Effect size (β) and p-value are presented, respectively. Columns A and B indicate which pairs were compared in each row

| **Region cluster** | **A** | **B** | **α-syn β, p, uncor.** | **α-syn β, p, age, sex cor.** | **α-syn β, p, age, sex, ID cor.** | **tau**  **β, p, uncor.** | **tau**  **β, p, age, sex cor.** | **tau**  **β, p, age, sex, ID cor.** | **Aβ**  **β, p, uncor.** | **Aβ**  **β, p, age, sex cor.** | **Aβ**  **β, p, age, sex, ID cor.** |
| --- | --- | --- | --- | --- | --- | --- | --- | --- | --- | --- | --- |
| cortical | 1 | 2a | β<0.001, **p=0.047** | β<0.001, **p=0.007** | β<0.001, p=0.22 | β=0.02, p=0.1 | β=0.031, **p=0.004** | β=0.02, p=0.47 | β=0.019, **p=0.014** | β=0.018, **p=0.037** | β=0.017, p=0.77 |
| cortical | 1 | 2b | β<0.001, **p<0.001** | β<0.001, **p<0.001** | β<0.001, **p<0.001** | β=-0.037, **p<0.001** | β=-0.035, **p<0.001** | β=-0.038, p=0.09 | β=-0.003, p=0.59 | β=-0.002, p=0.77 | β=-0.003, p=0.91 |
| cortical | 1 | 2c | β=0.006, **p<0.001** | β=0.006, **p<0.001** | β=0.006, p=0.05 | β=-0.003, p=0.43 | β=-0.008, **p=0.022** | β=-0.008, p=0.42 | β=0.009, **p<0.001** | β=0.007, **p=0.01** | β=0.005, p=0.77 |
| cortical | 2a | 2b | β=0.001, **p<0.001** | β=0.001, **p=0.004** | β=0.001, p=0.09 | β=-0.095, **p<0.001** | β=-0.109, **p<0.001** | β=-0.106, p=0.07 | β=-0.025, p=0.09 | β=-0.024, p=0.19 | β=-0.024, p=0.77 |
| cortical | 2a | 2c | β=0.008, **p<0.001** | β=0.01, **p<0.001** | β=0.01, **p=0.022** | β=-0.015, **p=0.037** | β=-0.024, **p<0.001** | β=-0.018, p=0.41 | β=0.004, p=0.44 | β=0.001, p=0.82 | β>-0.001, p=1 |
| cortical | 2b | 2c | β=0.015, **p=0.007** | β=0.016, **p=0.004** | β=0.015, p=0.25 | β=0.06, **p=0.001** | β=0.034, p=0.11 | β=0.046, p=0.42 | β=0.03, **p=0.036** | β=0.018, p=0.34 | β=0.018, p=0.77 |
| subcortical | 1 | 2a | β<0.001, p=0.16 | β<0.001, p=0.06 | β<0.001, p=0.09 | β=0.002, p=0.75 | β=0.005, p=0.6 | β=0.004, p=0.73 | β=0.022, **p=0.025** | β=0.022, **p=0.048** | β=0.019, p=0.77 |
| subcortical | 1 | 2b | β<0.001, **p<0.001** | β<0.001, **p<0.001** | β<0.001, **p<0.001** | β=-0.007, p=0.37 | β=-0.009, p=0.26 | β=-0.008, p=0.42 | β=0.003, p=0.35 | β=0.004, p=0.34 | β=0.004, p=0.77 |
| subcortical | 1 | 2c | β=0.002, **p=0.005** | β=0.002, **p=0.006** | β=0.002, **p=0.022** | β=0.002, p=0.66 | β=-0.004, p=0.34 | β=-0.004, p=0.47 | β=0.004, p=0.24 | β=0.002, p=0.57 | β=0.002, p=0.81 |
| subcortical | 2a | 2b | β<0.001, p=0.21 | β<0.001, p=0.66 | β<0.001, p=0.63 | β=-0.018, p=0.37 | β=-0.024, p=0.22 | β=-0.024, p=0.24 | β=-0.016, p=0.29 | β=-0.012, p=0.48 | β=-0.006, p=0.91 |
| subcortical | 2a | 2c | β=0.002, **p=0.002** | β=0.002, **p=0.004** | β=0.002, **p=0.021** | β=0.002, p=0.75 | β=-0.01, p=0.26 | β=-0.008, p=0.42 | β=-0.004, p=0.33 | β=-0.005, p=0.34 | β=-0.004, p=0.77 |
| subcortical | 2b | 2c | β=0.006, p=0.12 | β=0.005, p=0.15 | β=0.005, p=0.19 | β=0.02, p=0.5 | β=0.003, p=0.94 | β=0.003, p=0.95 | β=0.004, p=0.67 | β=-0.007, p=0.58 | β=-0.007, p=0.82 |
| hippocampal | 1 | 2a | β=0.001, **p=0.005** | β=0.001, **p=0.012** | β=0.001, p=0.11 | β=-0.012, p=0.45 | β=-0.009, p=0.6 | β=-0.008, p=0.84 | β=0.014, **p=0.025** | β=0.012, p=0.09 | β=0.012, p=0.77 |
| hippocampal | 1 | 2b | β=0.001, **p=0.005** | β=0.002, **p<0.001** | β=0.002, **p<0.001** | β=-0.048, **p<0.001** | β=-0.047, **p<0.001** | β=-0.046, p=0.07 | β=-0.001, p=0.61 | β>-0.001, p=0.97 | β=0.001, p=0.94 |
| hippocampal | 1 | 2c | β=0.003, **p<0.001** | β=0.003, **p<0.001** | β=0.003, **p=0.002** | β=0.001, p=0.75 | β=-0.001, p=0.88 | β>-0.001, p=0.97 | β=0.002, p=0.08 | β=0.001, p=0.48 | β=0.001, p=0.87 |
| hippocampal | 2a | 2b | β=0.001, p=0.17 | β=0.001, p=0.06 | β=0.001, p=0.16 | β=-0.084, **p=0.001** | β=-0.1, **p<0.001** | β=-0.1, p=0.12 | β=-0.017, p=0.24 | β=-0.012, p=0.48 | β=-0.01, p=0.91 |
| hippocampal | 2a | 2c | β=0.004, **p<0.001** | β=0.004, **p<0.001** | β=0.004, **p<0.001** | β=0.008, p=0.37 | β=0.005, p=0.6 | β=0.005, p=0.76 | β=-0.003, p=0.32 | β=-0.005, p=0.3 | β=-0.005, p=0.77 |
| hippocampal | 2b | 2c | β=0.007, **p=0.005** | β=0.008, **p=0.004** | β=0.008, p=0.022 | β=0.1, **p<0.001** | β=0.1, **p<0.001** | β=0.1, **p=0.014** | β=0.01, p=0.24 | β=0.005, p=0.57 | β=0.003, p=0.91 |
| amygdala-entorhinal | 1 | 2a | β=0.008, **p<0.001** | β=0.007, **p=0.001** | β=0.007, **p=0.001** | β=-0.031, p=0.37 | β=-0.001, p=0.98 | β=-0.001, p=0.98 | β=-0.013, p=0.24 | β=-0.012, p=0.34 | β=-0.012, p=0.77 |
| amygdala-entorhinal | 1 | 2b | β=0.001, **p<0.001** | β=0.001, **p<0.001** | β=0.001, **p<0.001** | β=-0.059, p=0.07 | β=-0.066, **p=0.021** | β=-0.069, p=0.09 | β=-0.006, p=0.34 | β=-0.004, p=0.48 | β=-0.004, p=0.77 |
| amygdala-entorhinal | 1 | 2c | β=0.007, **p<0.001** | β=0.008, **p<0.001** | β=0.008, **p<0.001** | β=-0.013, p=0.22 | β=-0.016, p=0.08 | β=-0.015, p=0.24 | β<0.001, p=0.95 | β=0.001, p=0.82 | β=0.001, p=0.91 |
| amygdala-entorhinal | 2a | 2b | β=-0.006, p=0.24 | β=-0.003, p=0.66 | β=-0.003, p=0.63 | β=-0.091, p=0.18 | β=-0.175, p=0.06 | β=-0.181, p=0.12 | β=0.002, p=0.83 | β=0.003, p=0.82 | β=0.003, p=0.91 |
| amygdala-entorhinal | 2a | 2c | β=0.007, **p=0.014** | β=0.009, **p=0.004** | β=0.008, **p=0.017** | β=-0.004, p=0.75 | β=-0.018, p=0.31 | β=-0.018, p=0.45 | β=0.007, p=0.32 | β=0.01, p=0.34 | β=0.01, p=0.77 |
| amygdala-entorhinal | 2b | 2c | β=0.02, **p=0.046** | β=0.022, **p=0.032** | β=0.022, p=0.06 | β=0.08, p=0.23 | β=0.09, p=0.16 | β=0.1, p=0.25 | β=0.012, p=0.39 | β=0.014, p=0.48 | β=0.014, p=0.77 |
| brainstem | 1 | 2a | β<0.001, **p=0.008** | β=0.001, **p=0.005** | β=0.001, **p=0.021** | β=-0.007, p=0.33 | β=-0.005, p=0.46 | β=-0.005, p=0.54 | β=0.002, p=0.61 | β=0.003, p=0.58 | β=0.004, p=1 |
| brainstem | 1 | 2b | β=0.004, **p<0.001** | β=0.004, **p<0.001** | β=0.004, **p<0.001** | β=-0.007, p=0.18 | β=-0.009, p=0.06 | β=-0.008, p=0.2 | β=-0.003, p=0.35 | β=-0.003, p=0.48 | β=nan, p=nan |
| brainstem | 1 | 2c | β=0.003, **p=0.001** | β=0.003, **p=0.002** | β=0.003, p=0.022 | β=0.001, p=0.74 | β=0.001, p=0.74 | β=0.001, p=0.73 | β=0.001, p=0.46 | β=-0.001, p=0.71 | β=-0.001, p=0.87 |
| brainstem | 2a | 2b | β=0.007, **p<0.001** | β=0.007, **p<0.001** | β=0.007, **p<0.001** | β=-0.008, p=0.37 | β=-0.011, p=0.26 | β=-0.009, p=0.42 | β=-0.008, p=0.27 | β=-0.009, p=0.34 | β=-0.009, p=1 |
| brainstem | 2a | 2c | β=0.004, **p=0.008** | β=0.004, **p=0.005** | β=0.005, **p=0.049** | β=0.005, p=0.33 | β=0.003, p=0.58 | β=0.003, p=0.54 | β=0.001, p=0.83 | β=-0.003, p=0.52 | β=-0.003, p=0.77 |
| brainstem | 2b | 2c | β<0.001, p=0.98 | β<0.001, p=0.93 | β=0.003, p=0.72 | β=0.017, p=0.28 | β=0.014, p=0.39 | β=0.014, p=0.42 | β=0.008, p=0.37 | β=0.002, p=0.82 | β=0.002, p=0.91 |

All p-values were FDR corrected. Significant p-values were labeled in bold. *cor.* corrected, *FDR* false discovery rate, *ID* subject ID, *nan* not enough values available, *p* p-value, *uncor.* uncorrected


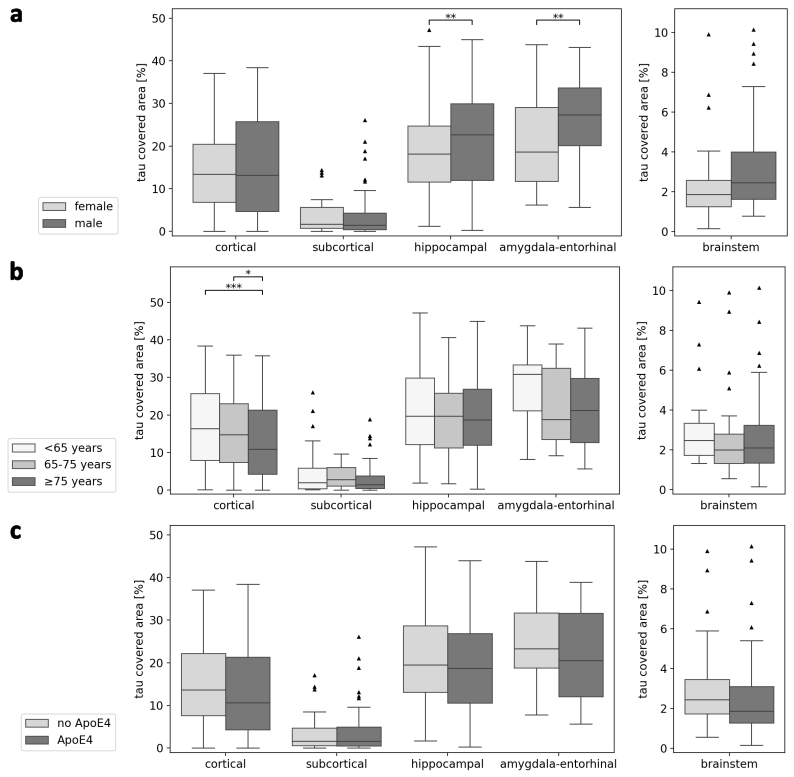


**Fig. 2** Tau load split up by (a) sex, (b) age at death and (c) ApoE genotype in Alzheimer’s disease cases. Statistics were calculated with multiple linear regression across region clusters correcting for specific region names and with false discovery rate correction but without age or sex correction. ApoE4 means that at least one ApoE4 allele is apparent


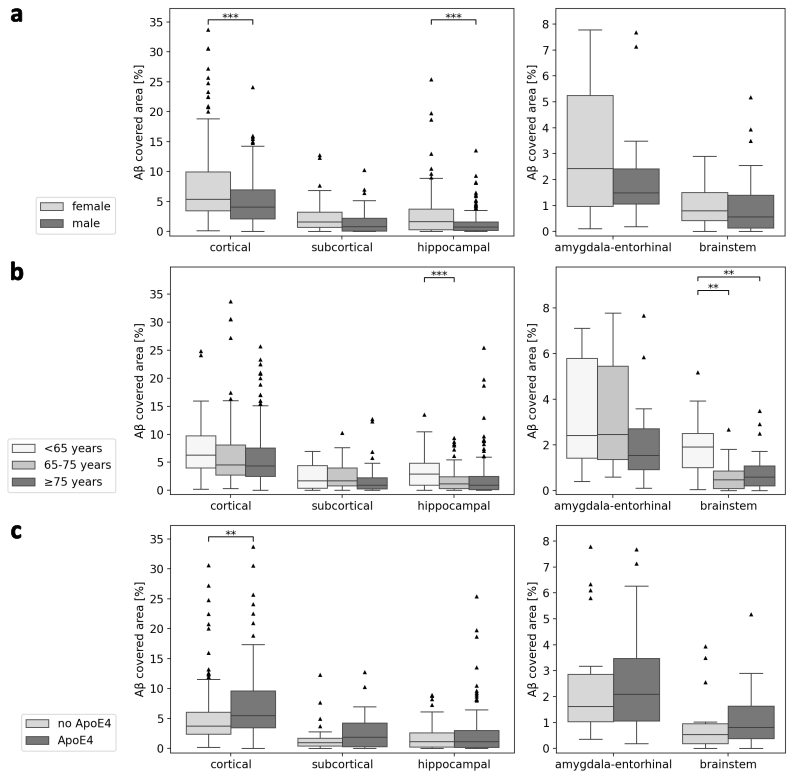


**Fig. 3** Aβ load split up by (a) sex, (b) age at death and (c) ApoE genotype in Alzheimer’s disease cases. Statistics were calculated with multiple linear regression across region clusters correcting for specific region names and with false discovery rate correction but without age or sex correction. ApoE4 means that at least one ApoE4 allele is apparent
